# Supplementary material for: Development of Hybrid Machine Learning Models for Predicting Permanent Transverse Displacement of Circular Hollow Section Steel Members under Impact Loads
Source: MDPI journal article supplement (doi:10.3390/buildings13061384), 2023-05-26
Supplement: s1 [file s1]

# Development of optimal ML models for predicting the permanent transverse displacement of CHS steel members

Sy Hung Mai <sup>1</sup>, Duc Hanh Nguyen <sup>1</sup>, Viet-Linh Tran <sup>2</sup> and Duc-Kien Thai <sup>3,\*</sup>

<sup>1</sup> Department of Hydraulic Engineering and Construction, Hanoi University of Civil Engineering (HUCE), Hanoi 116000, Vietnam

<sup>2</sup> Department of Civil Engineering, Vinh University, Vinh 461010, Vietnam

<sup>3</sup> Department of Civil and Environmental Engineering, Sejong University, 98 Gunja-Dong, Gwangjin-Gu, Seoul 143-747, Republic of Korea

\* Correspondence: [thaiduckien@sejong.ac.kr](mailto:thaiduckien@sejong.ac.kr); Tel.: +82-2-6935-2621; Fax: +82-2-3408-4332

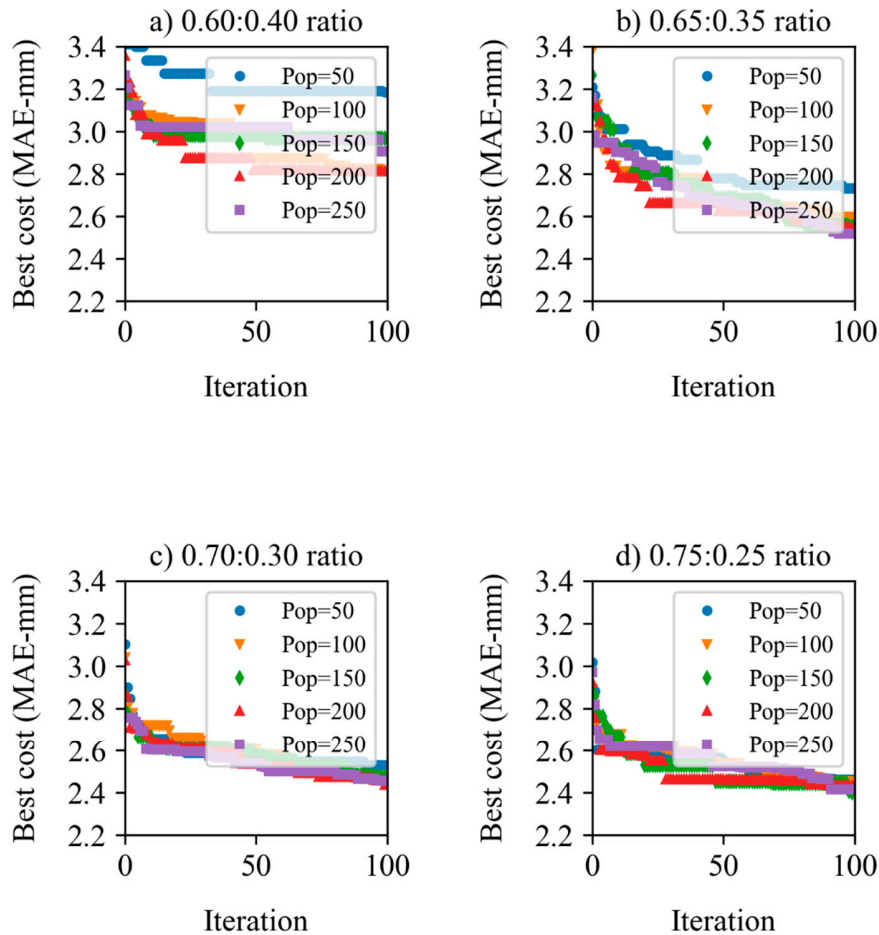

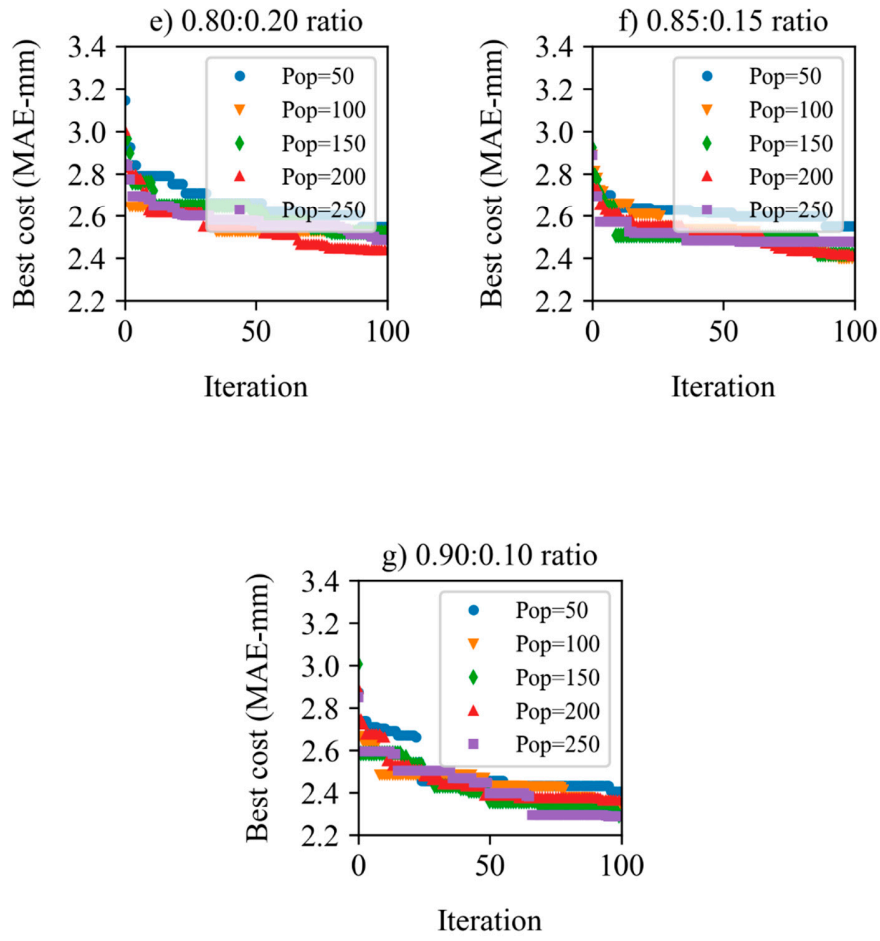

**Fig. S-1.** PSO-XGB models' optimization process for different population sizes.

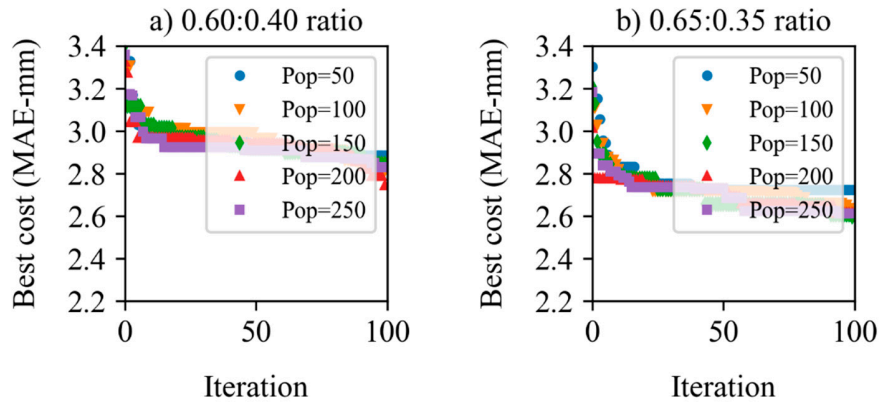

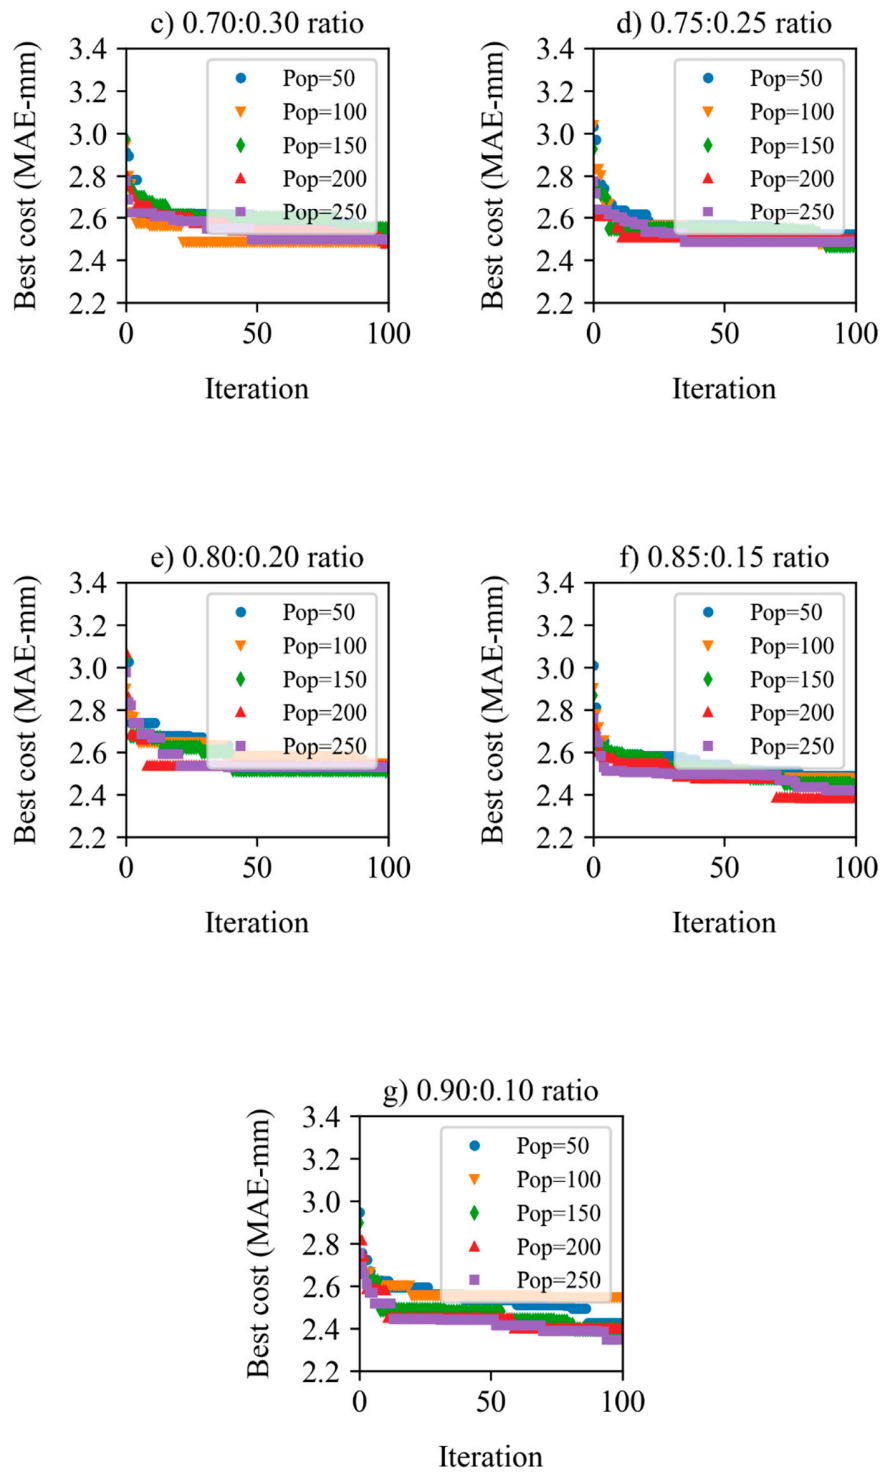

**Fig. S-2.** GWO-XGB models' optimization process for different population sizes.

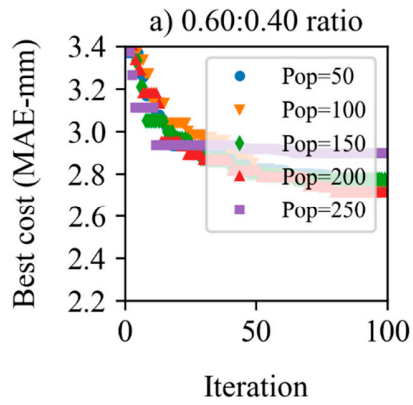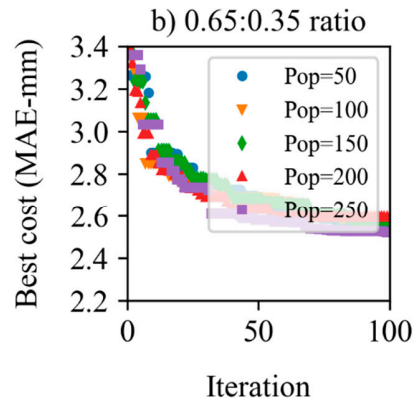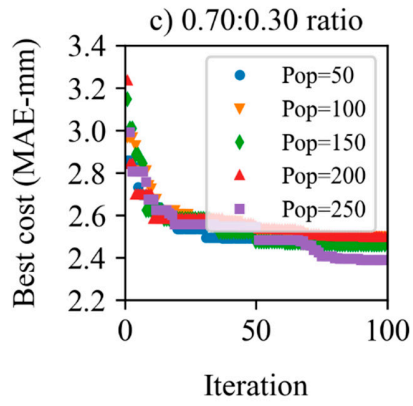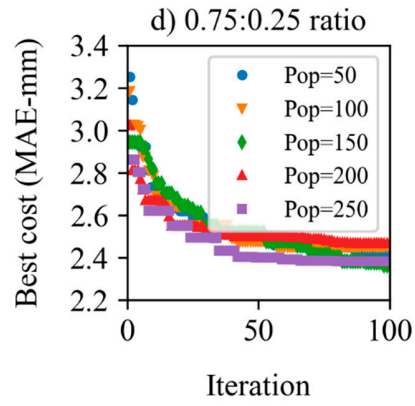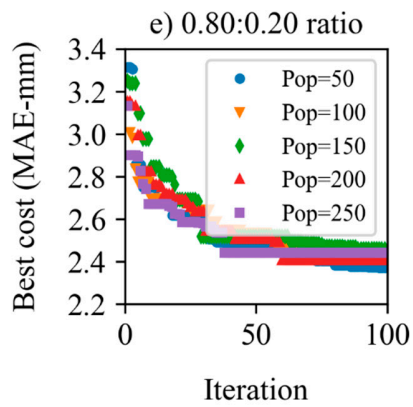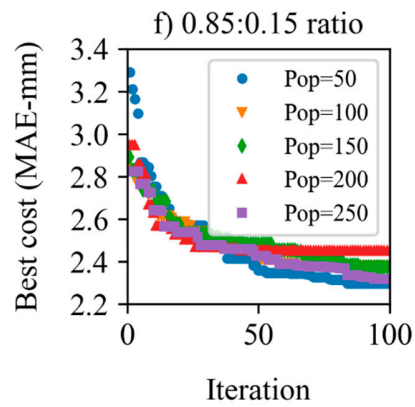

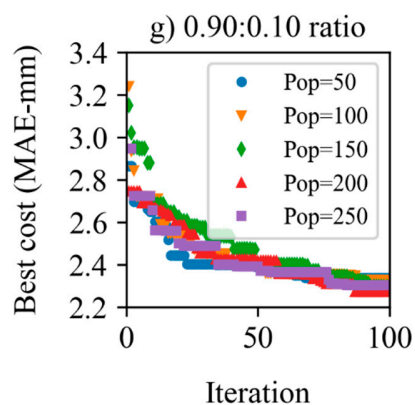

**Fig. S-3.** MFO-XGB models' optimization process for different population sizes.

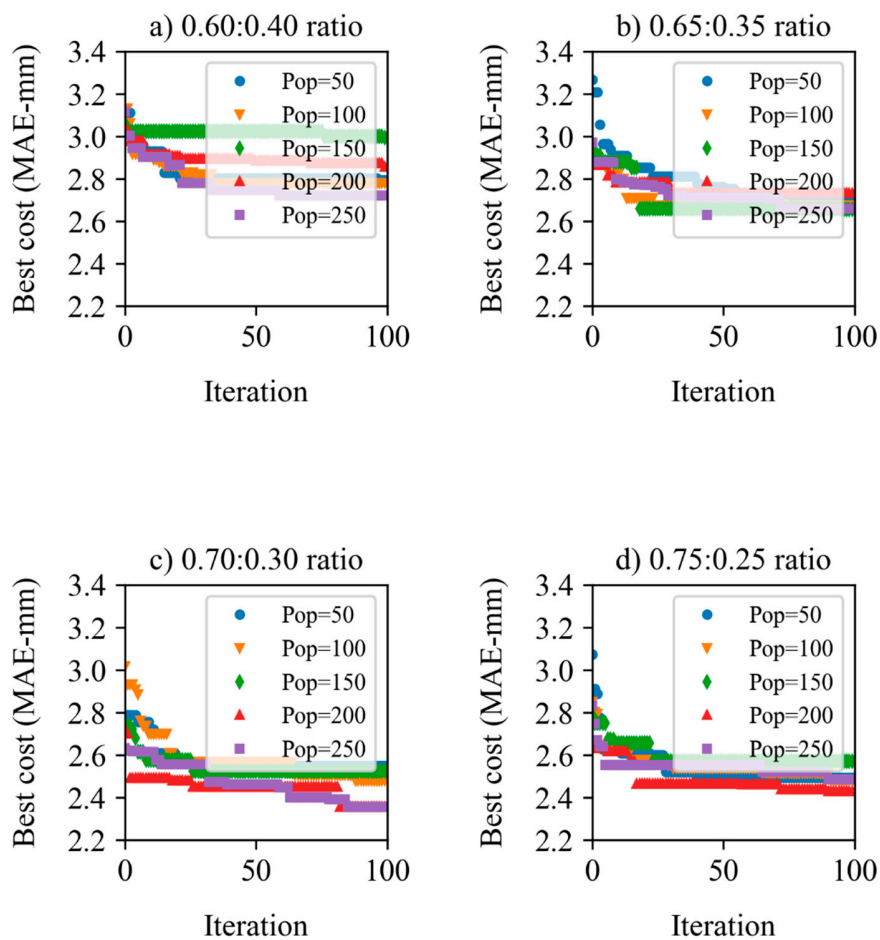

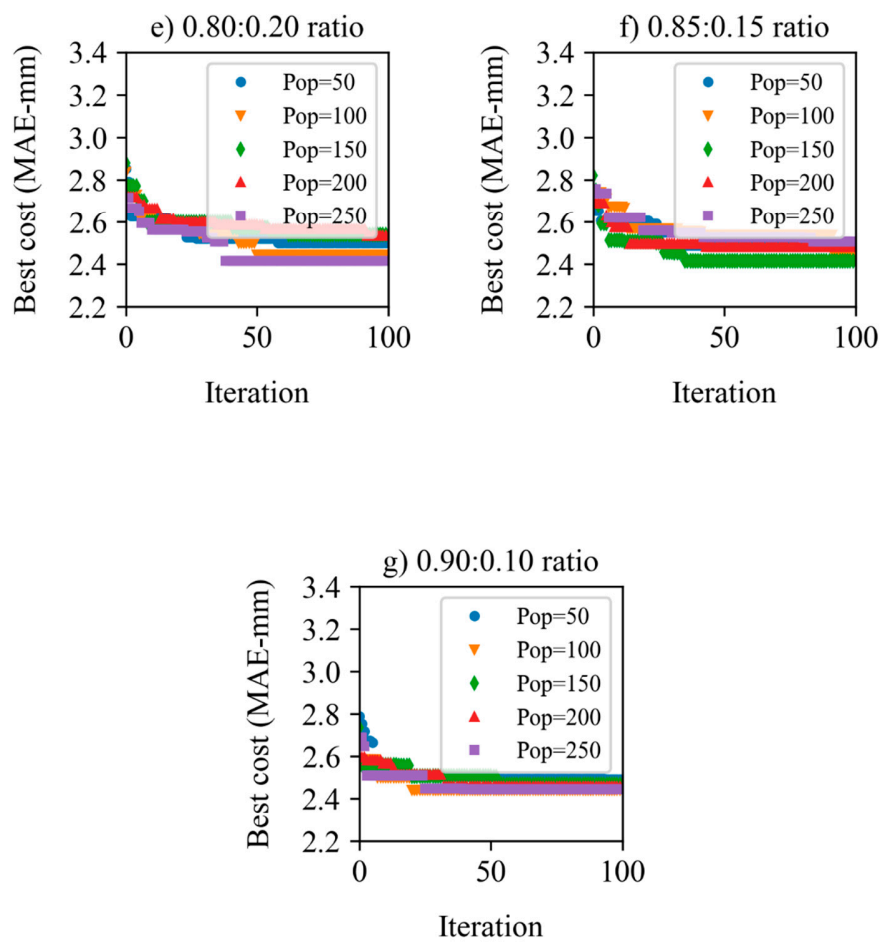

**Fig. S-4.** JA-XGB models' optimization process for different population sizes.

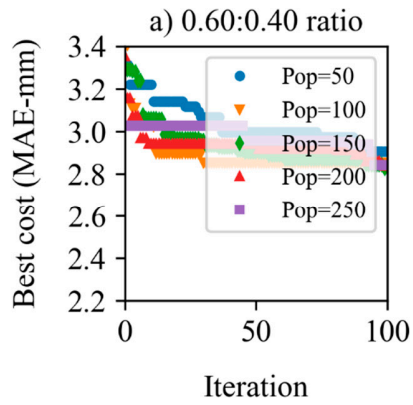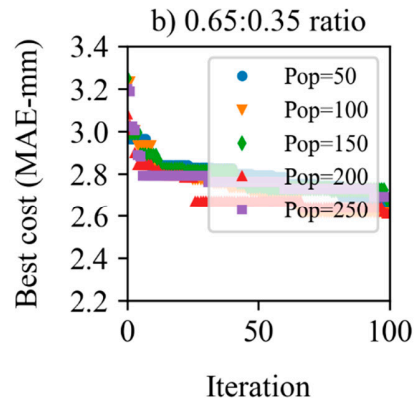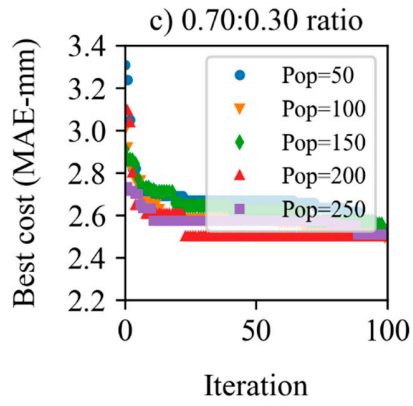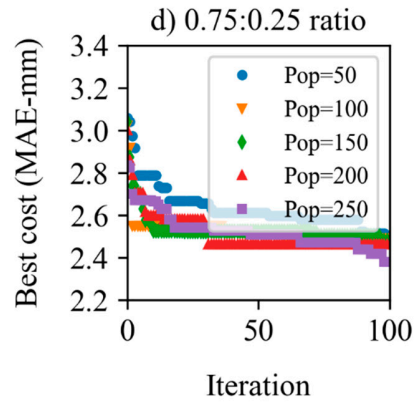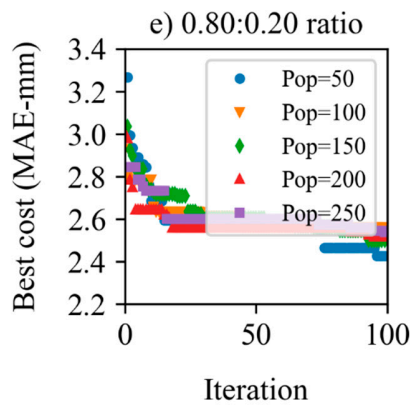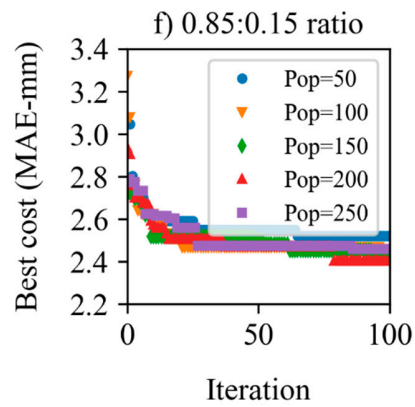

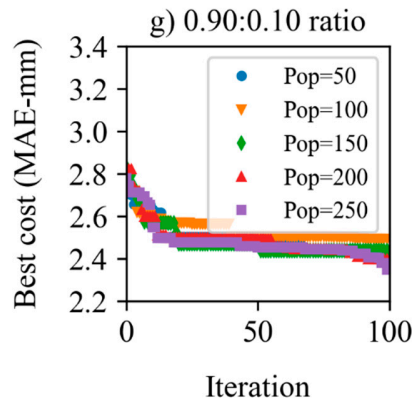

**Fig. S-5.** MVO-XGB models' optimization process for different population sizes.

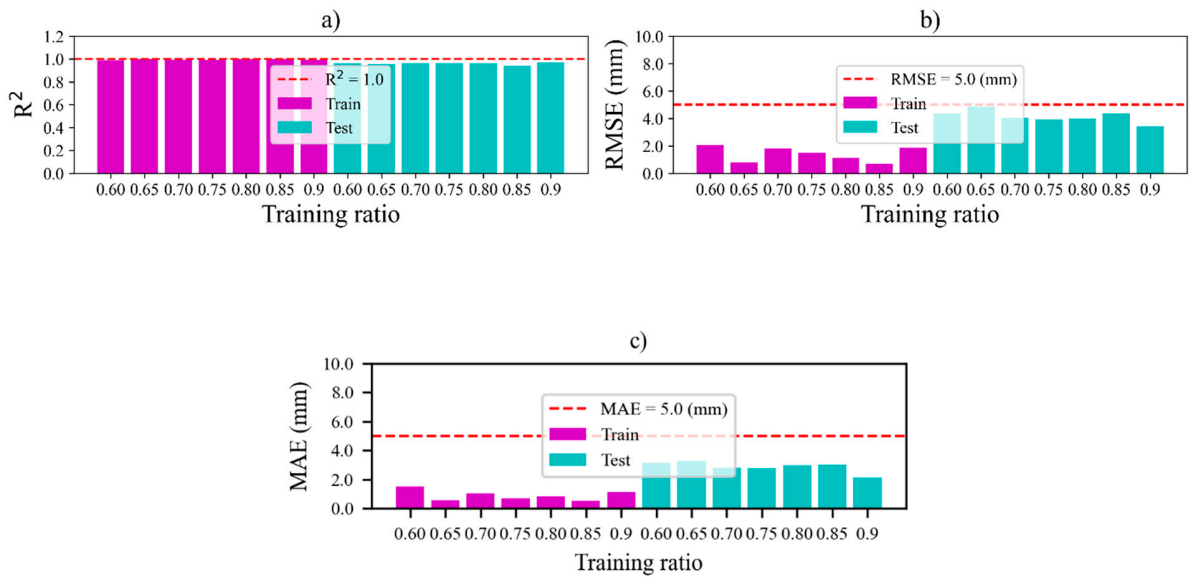

**Fig. S-6.** Effect of training-test ratios on the PSO-XGB model's performance with population size of 50.



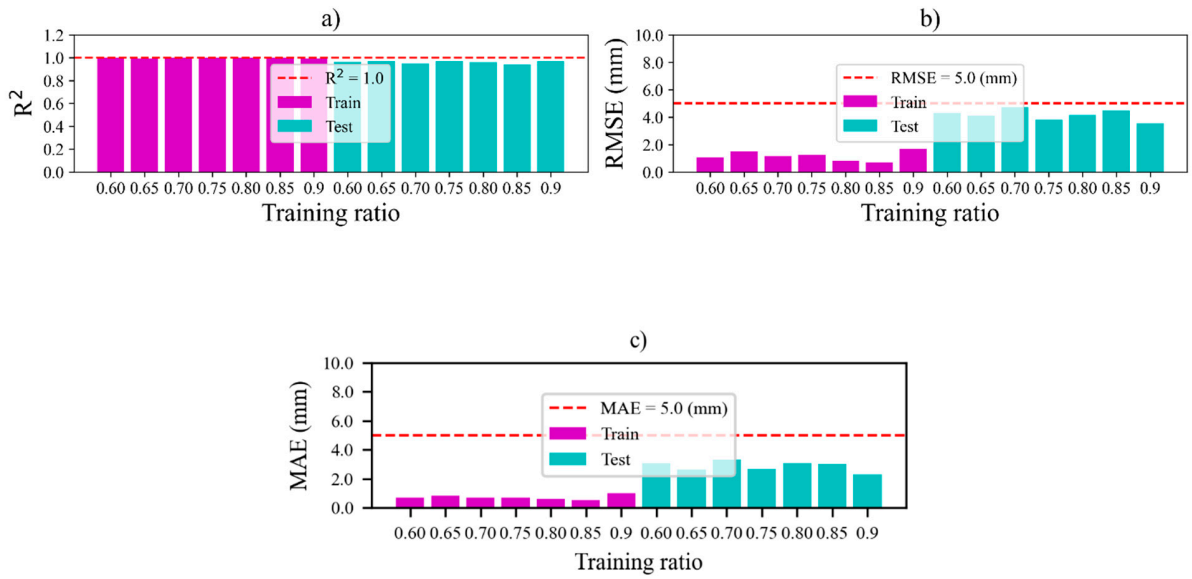

**Fig. S-7.** Effect of training-test ratios on the PSO-XGB model's performance with population size of 100.

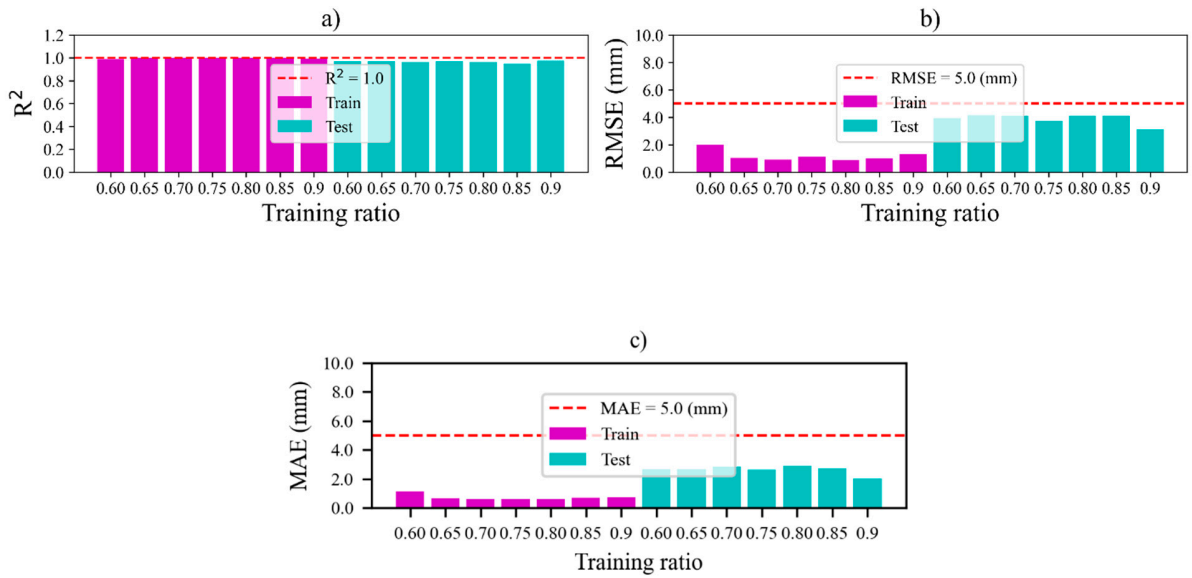

**Fig. S-8.** Effect of training-test ratios on the PSO-XGB model's performance with population size of 150.

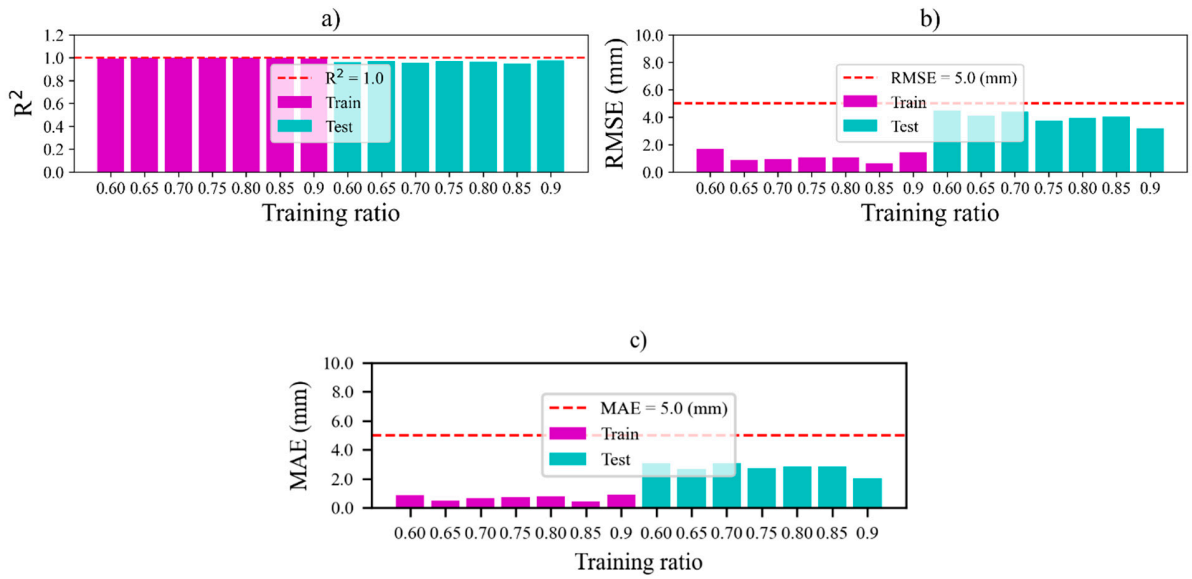

**Fig. S-9.** Effect of training-test ratios on the PSO-XGB model's performance with population size of 200.

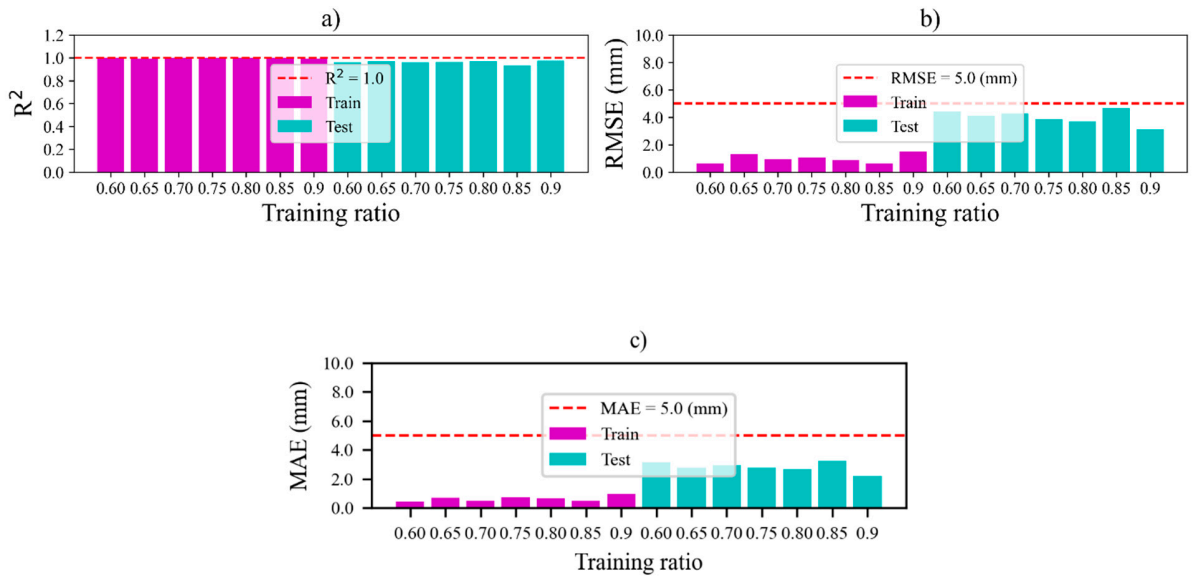

**Fig. S-10.** Effect of training-test ratios on the PSO-XGB model's performance with population size of 250.

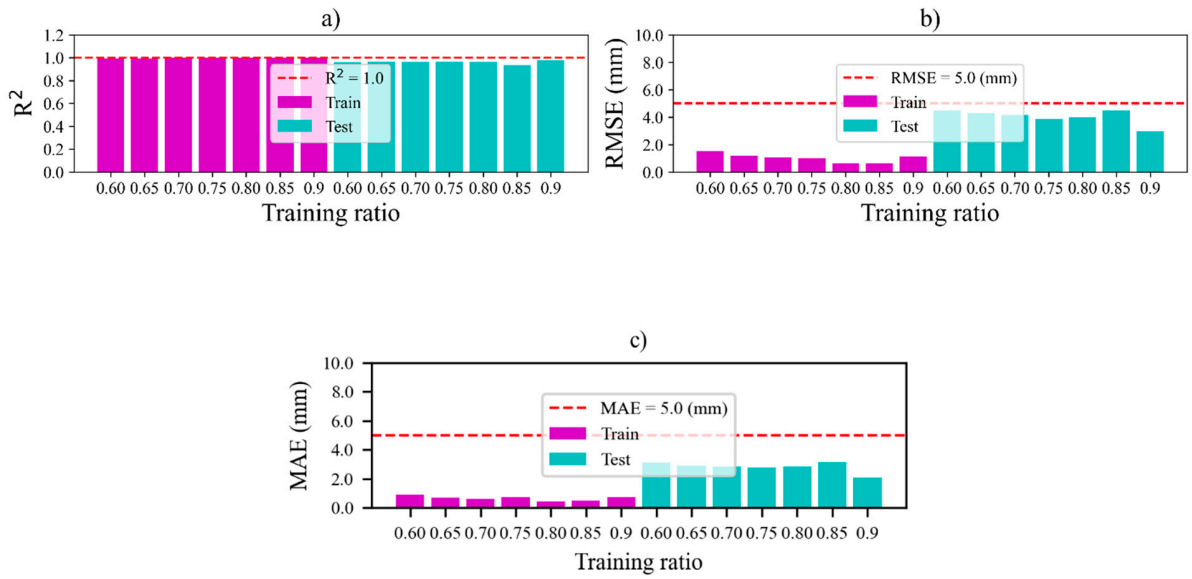

**Fig. S-11.** Effect of training-test ratios on the GWO-XGB model's performance with population size of 50.

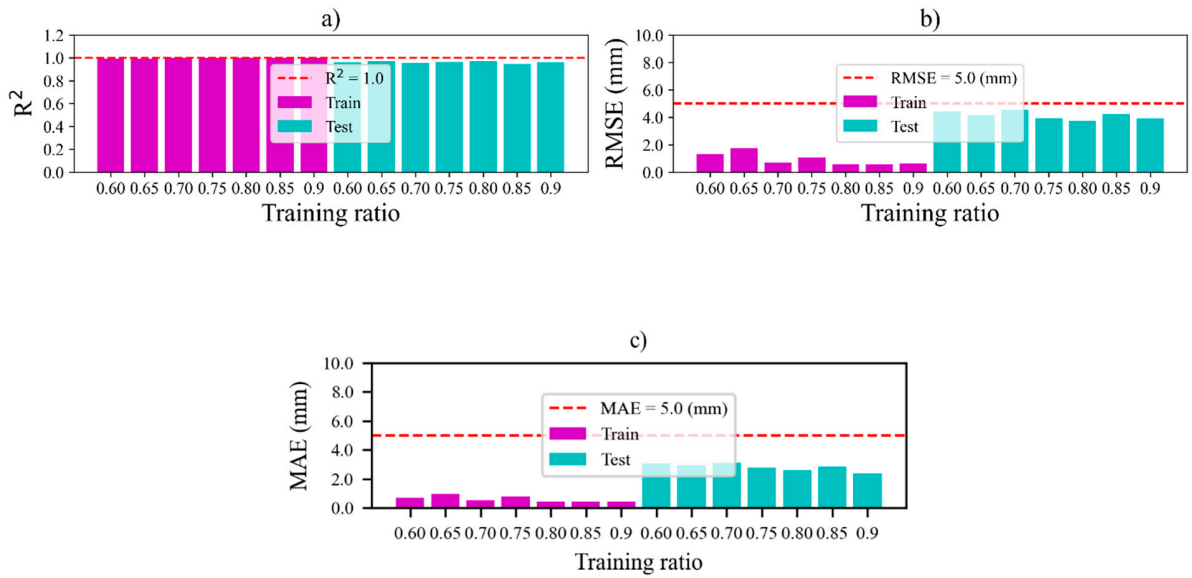

**Fig. S-12.** Effect of training-test ratios on the GWO-XGB model's performance with population size of 100.

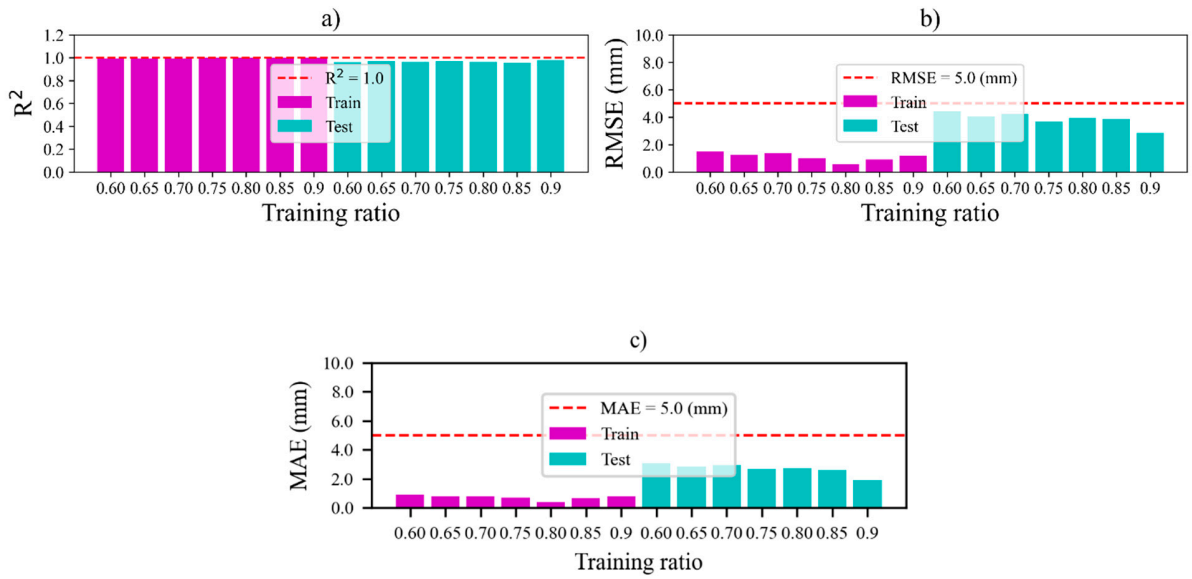

**Fig. S-13.** Effect of training-test ratios on the GWO-XGB model's performance with population size of 150.

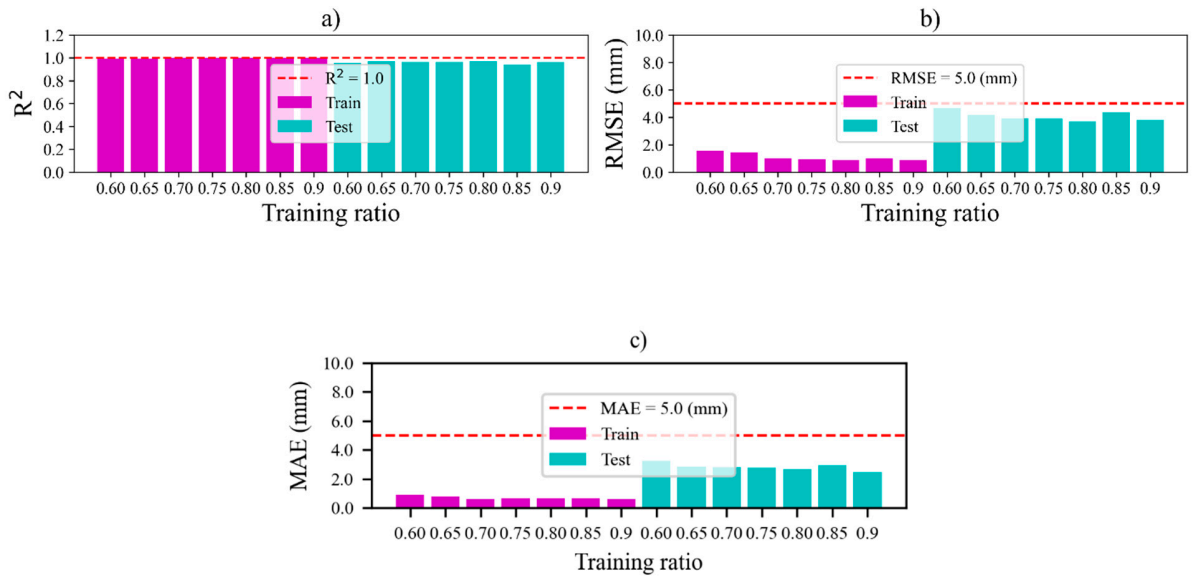

**Fig. S-14.** Effect of training-test ratios on the GWO-XGB model's performance with population size of 200.

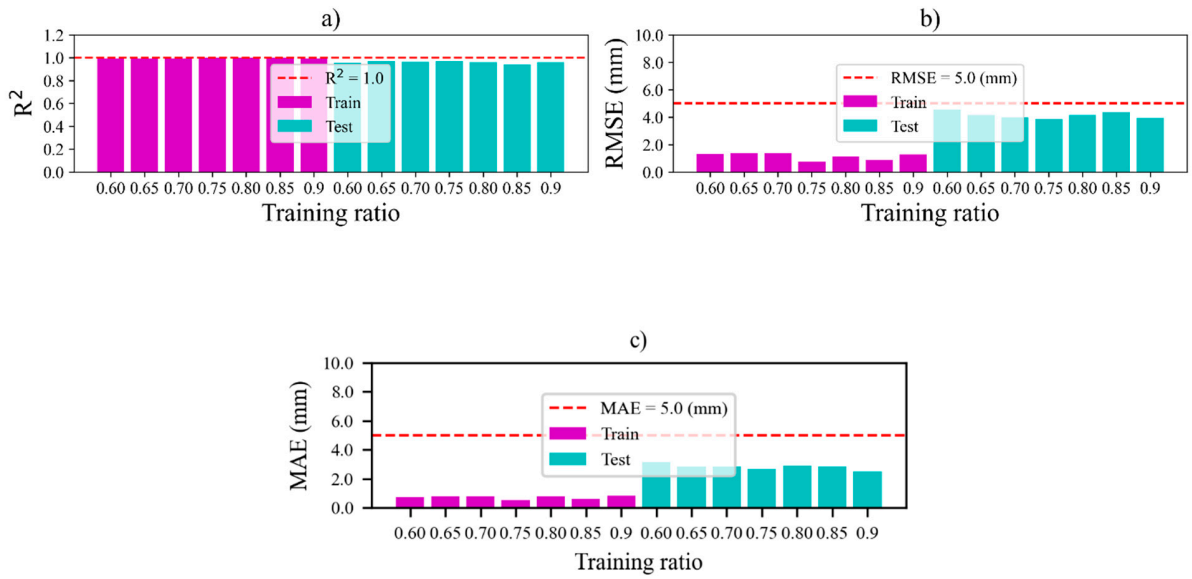

**Fig. S-15.** Effect of training-test ratios on the GWO-XGB model's performance with population size of 250.

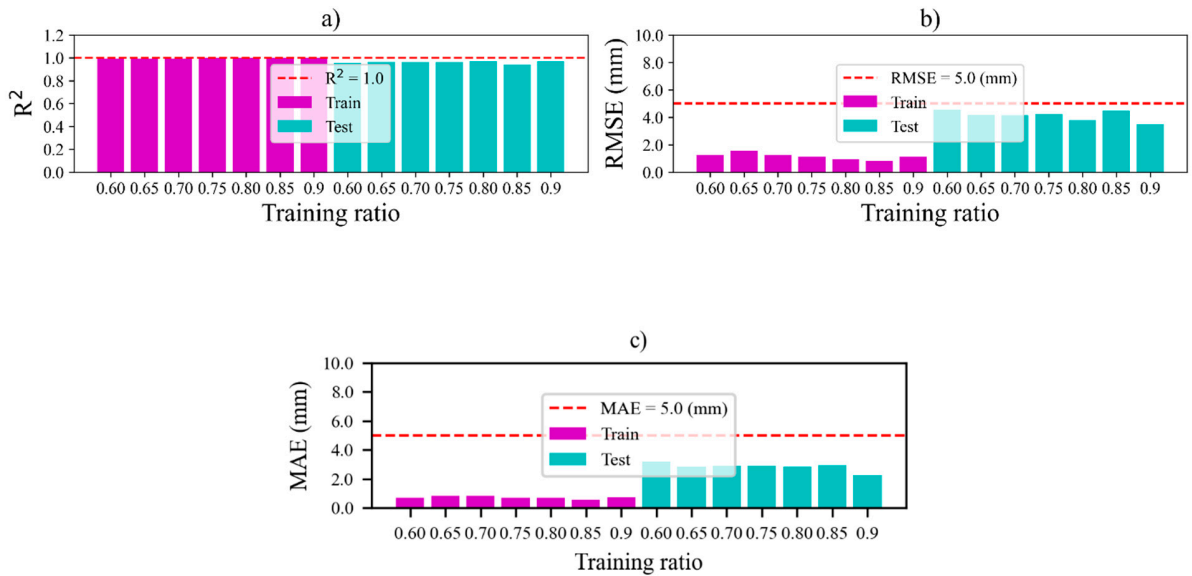

**Fig. S-16.** Effect of training-test ratios on the MFO-XGB model's performance with population size of 50.

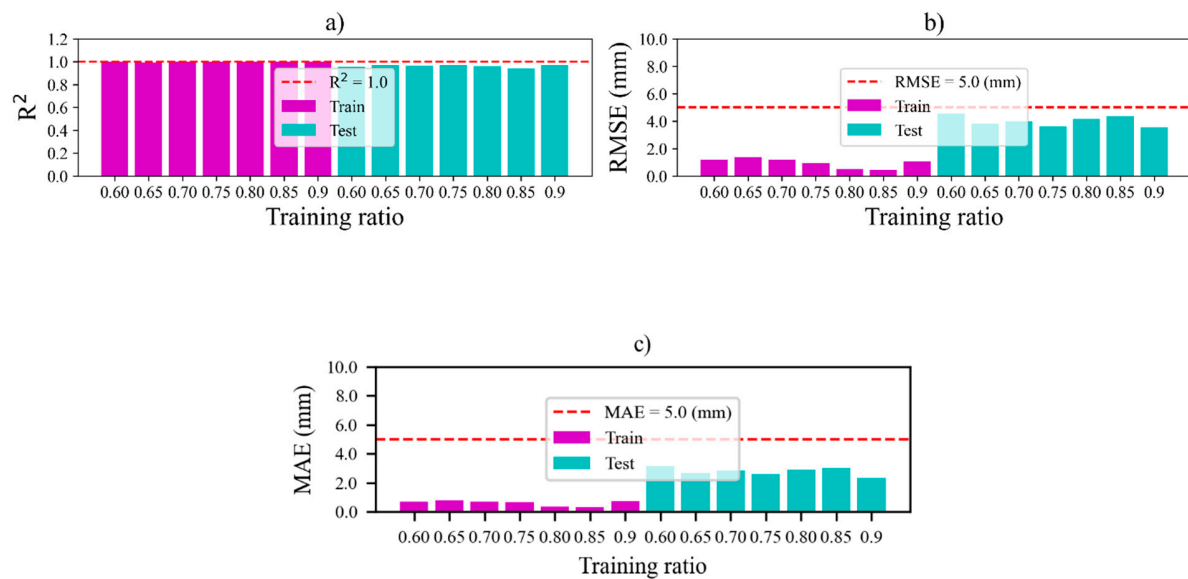

**Fig. S-17.** Effect of training-test ratios on the MFO-XGB model's performance with population size of 100.

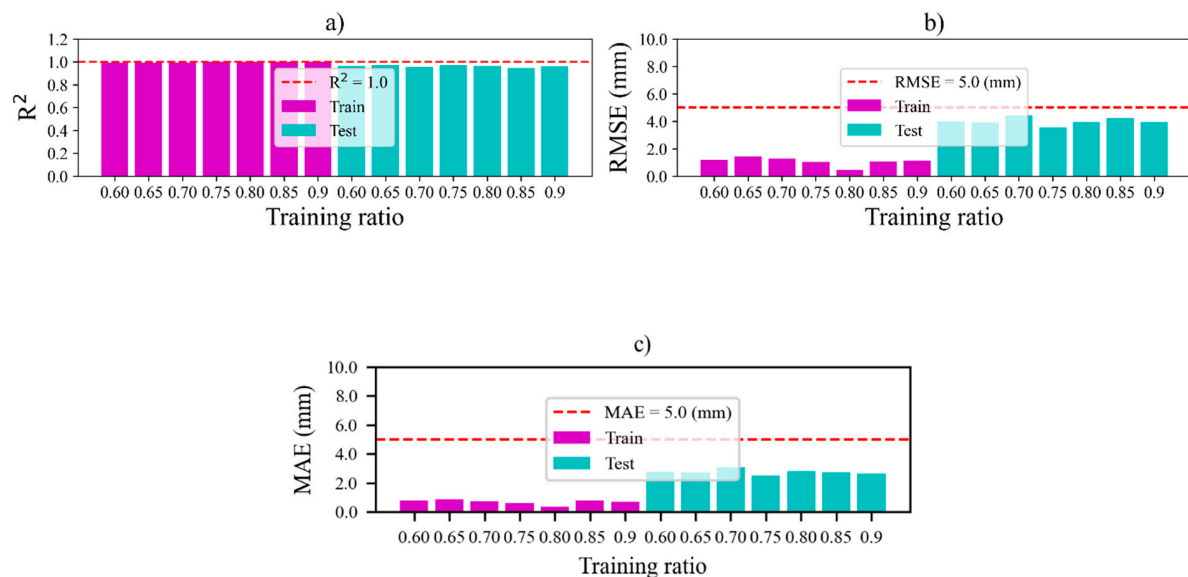

**Fig. S-18.** Effect of training-test ratios on the MFO-XGB model's performance with population size of 150.

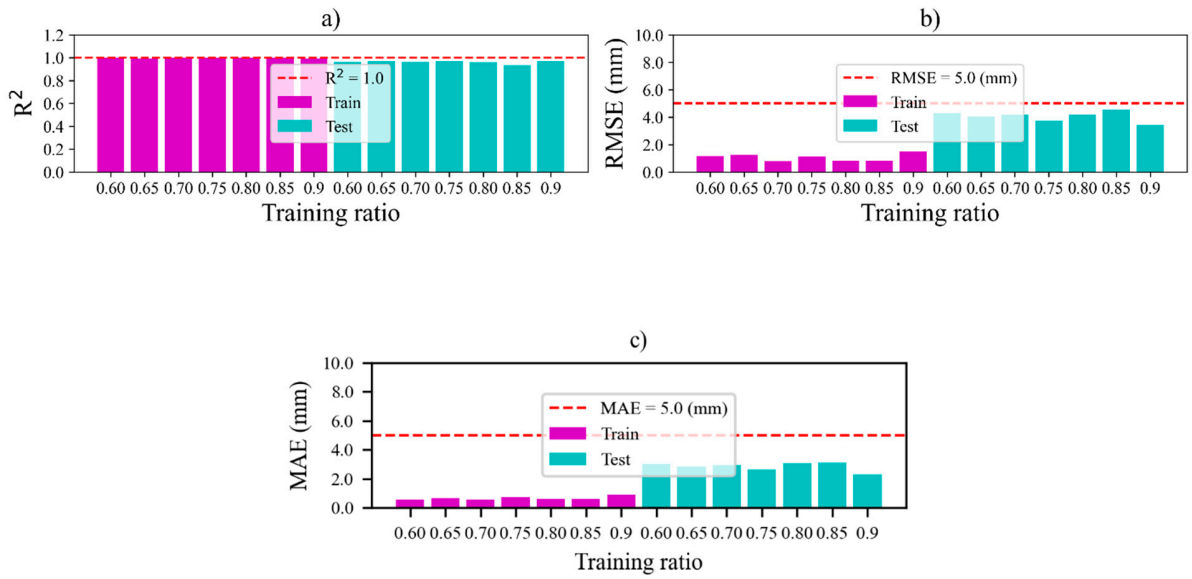

**Fig. S-19.** Effect of training-test ratios on the MFO-XGB model's performance with population size of 200.

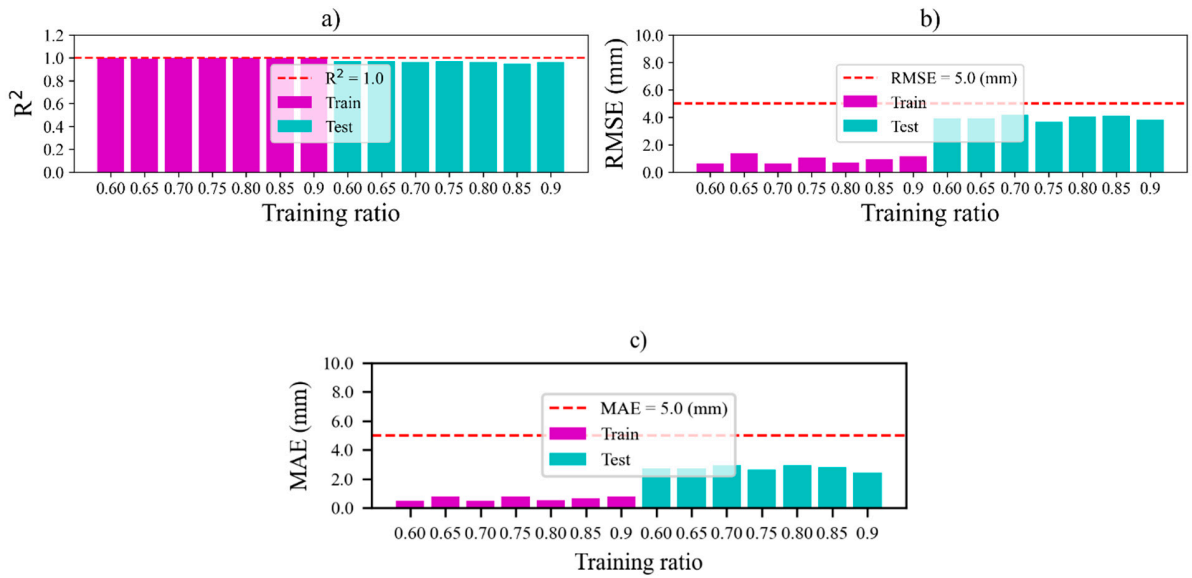

**Fig. S-20.** Effect of training-test ratios on the MFO-XGB model's performance with population size of 250.

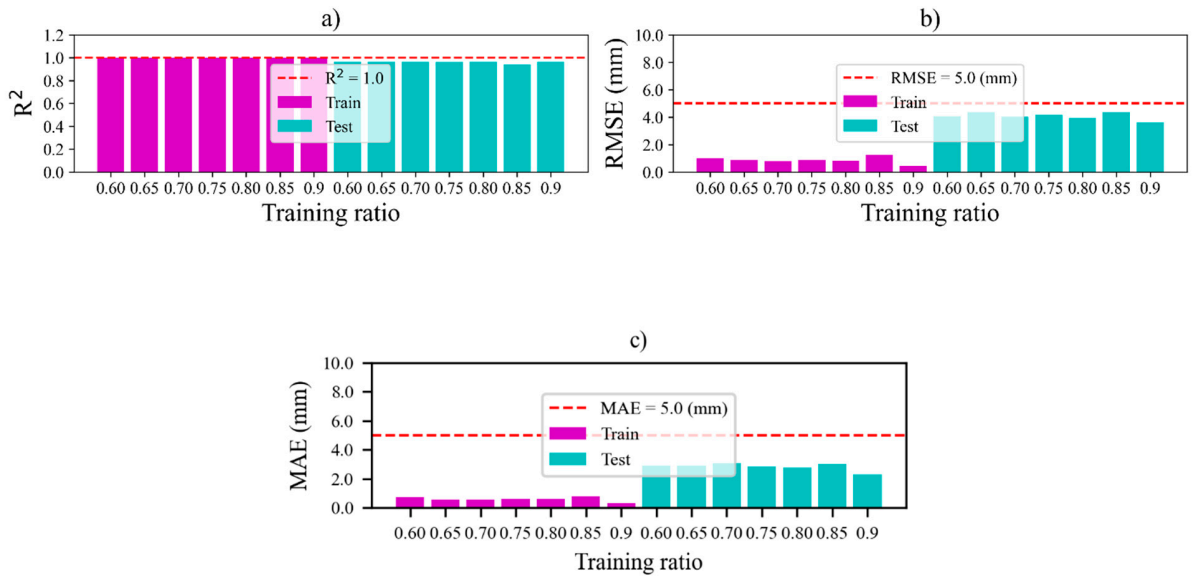

**Fig. S-21.** Effect of training-test ratios on the JA-XGB model's performance with population size of 50.

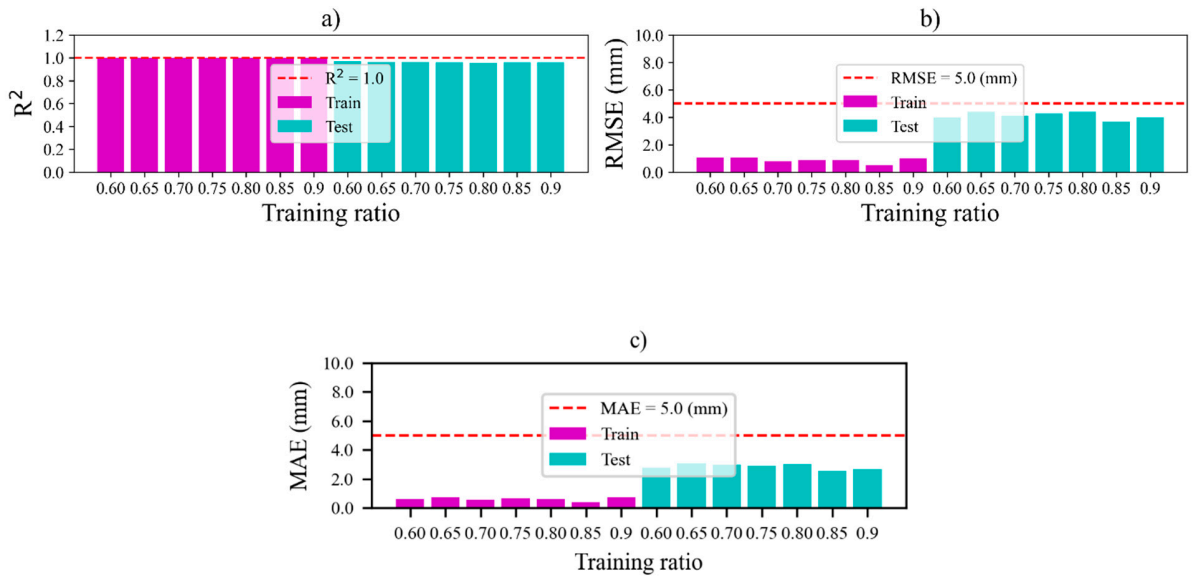

**Fig. S-22.** Effect of training-test ratios on the JA-XGB model's performance with population size of 100.



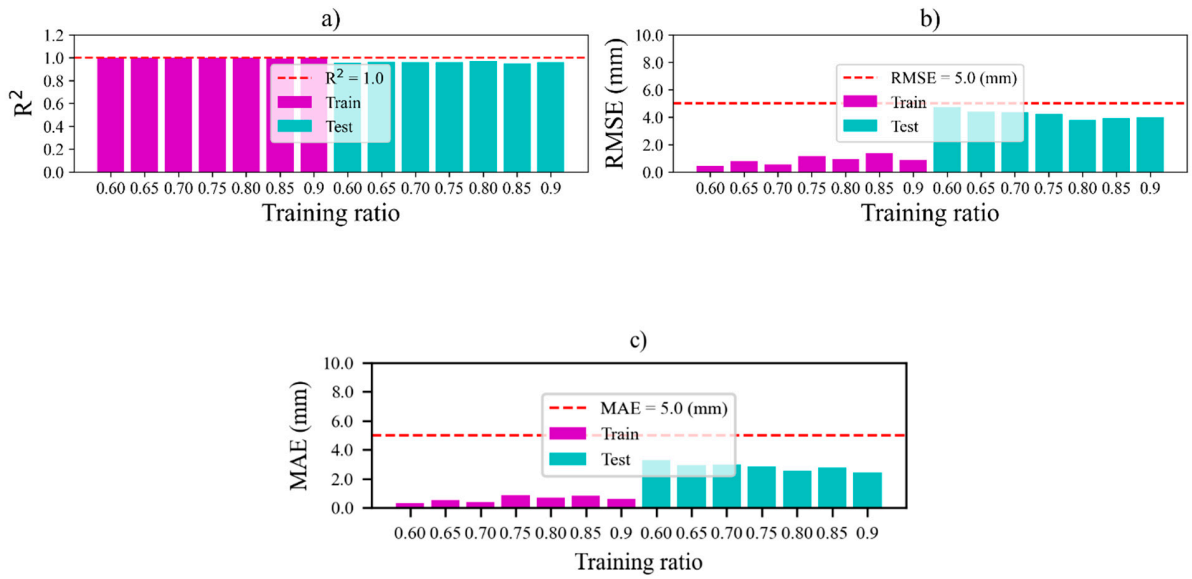

**Fig. S-23.** Effect of training-test ratios on the JA-XGB model's performance with population size of 150.

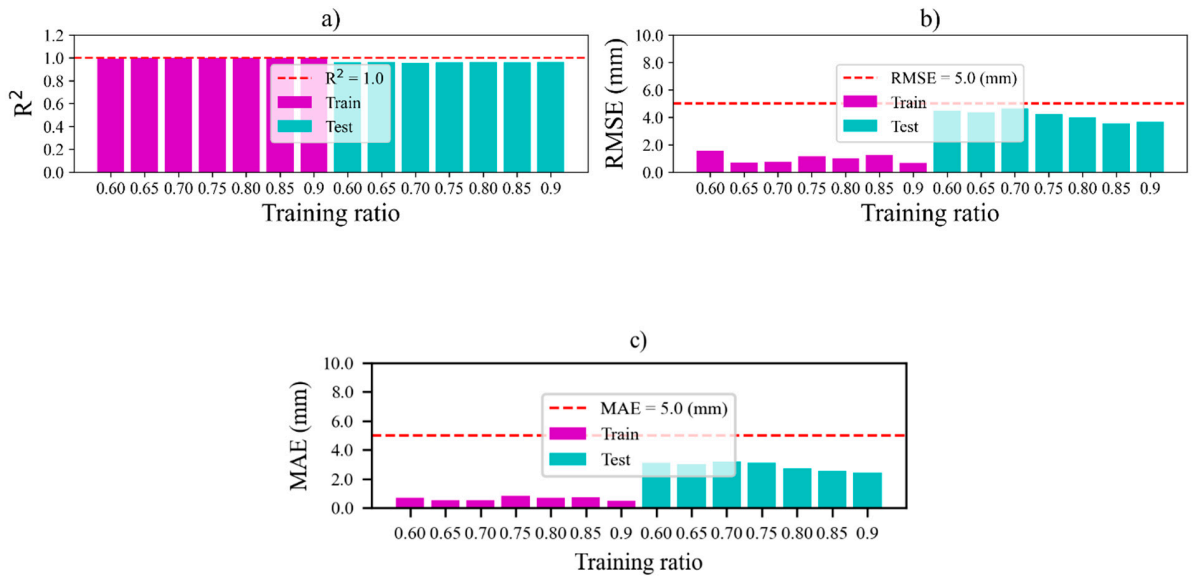

**Fig. S-24.** Effect of training-test ratios on the JA-XGB model's performance with population size of 200.

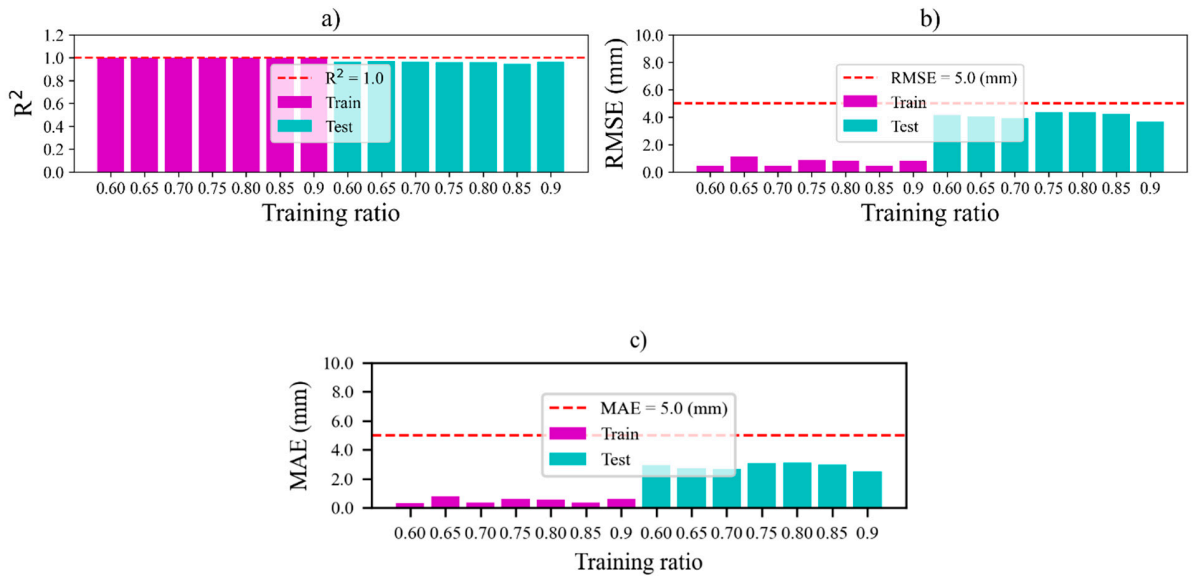

**Fig. S-25.** Effect of training-test ratios on the JA-XGB model's performance with population size of 250.

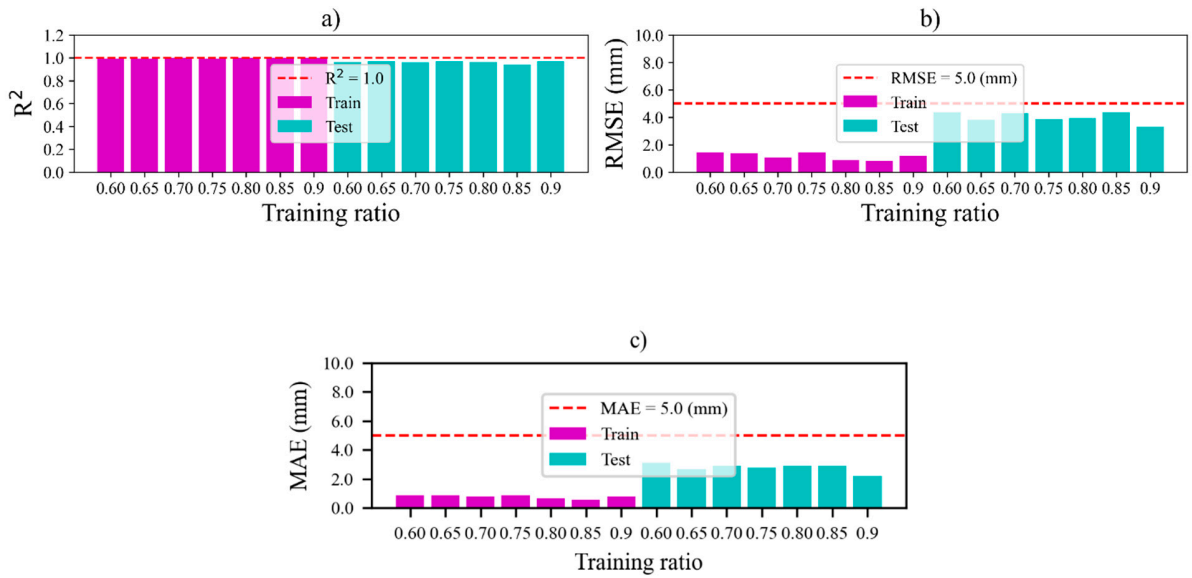

**Fig. S-26.** Effect of training-test ratios on the MVO-XGB model's performance with population size of 50.

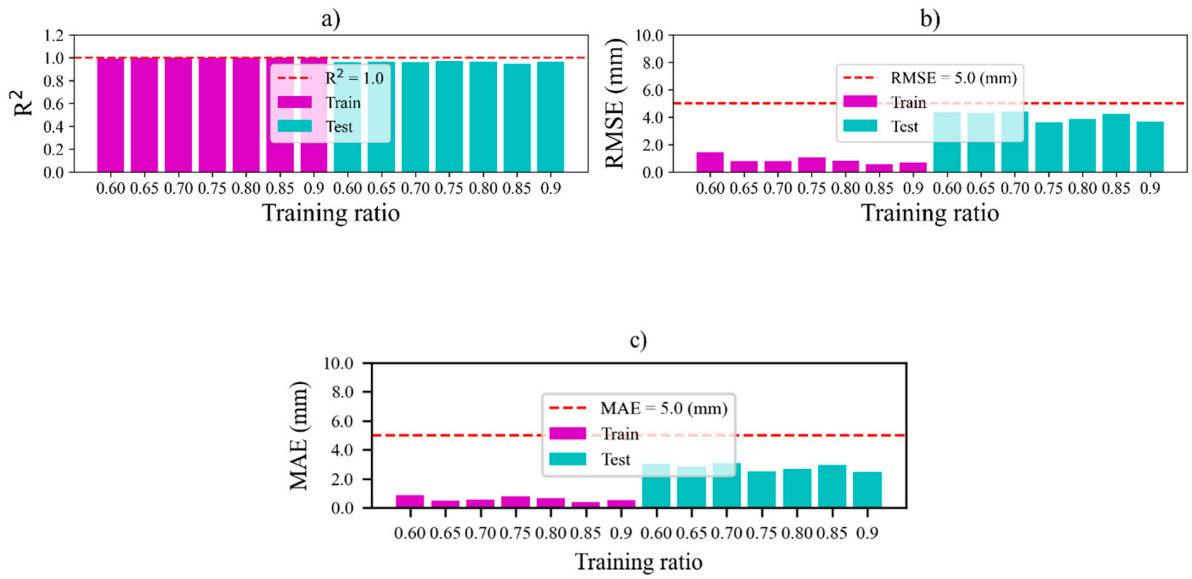

**Fig. S-27.** Effect of training-test ratios on the MVO-XGB model's performance with population size of 100.

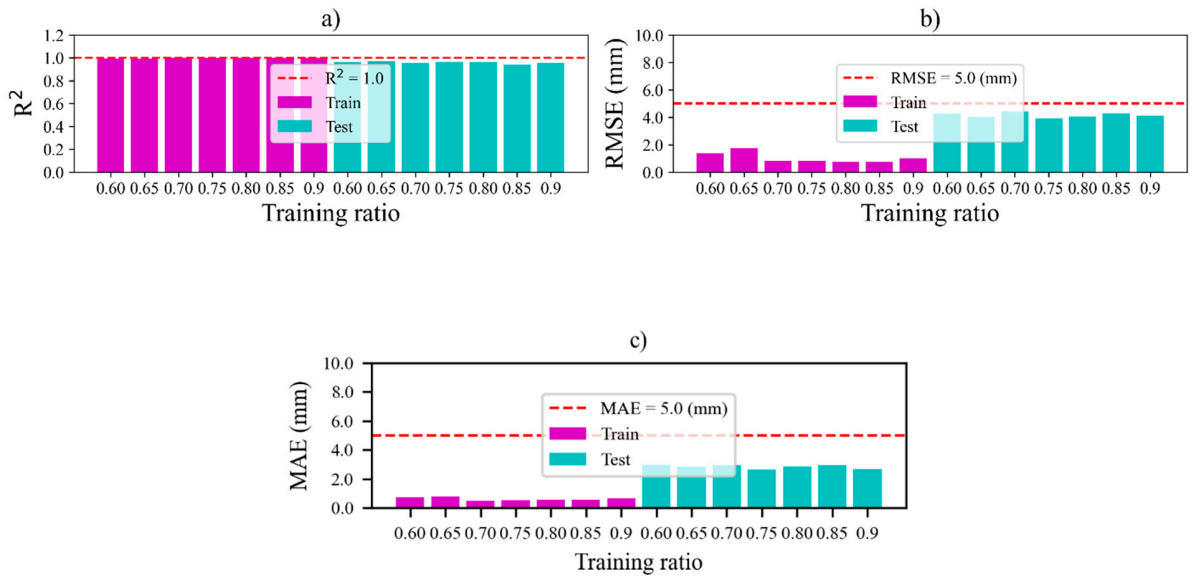

**Fig. S-28.** Effect of training-test ratios on the MVO-XGB model's performance with population size of 150.

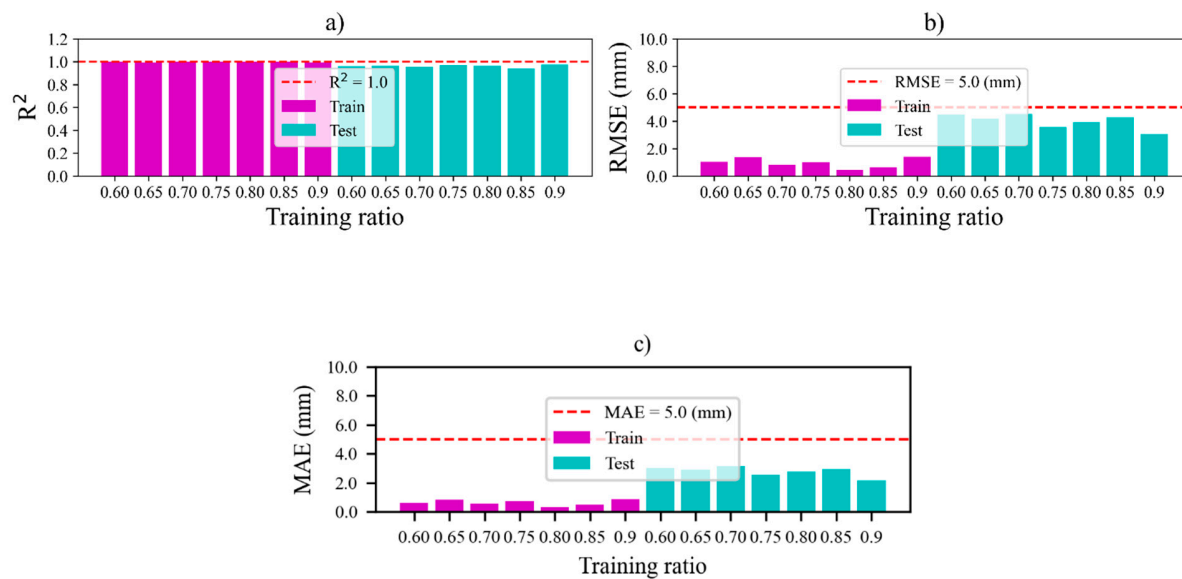

**Fig. S-29.** Effect of training-test ratios on the MVO-XGB model's performance with population size of 200.

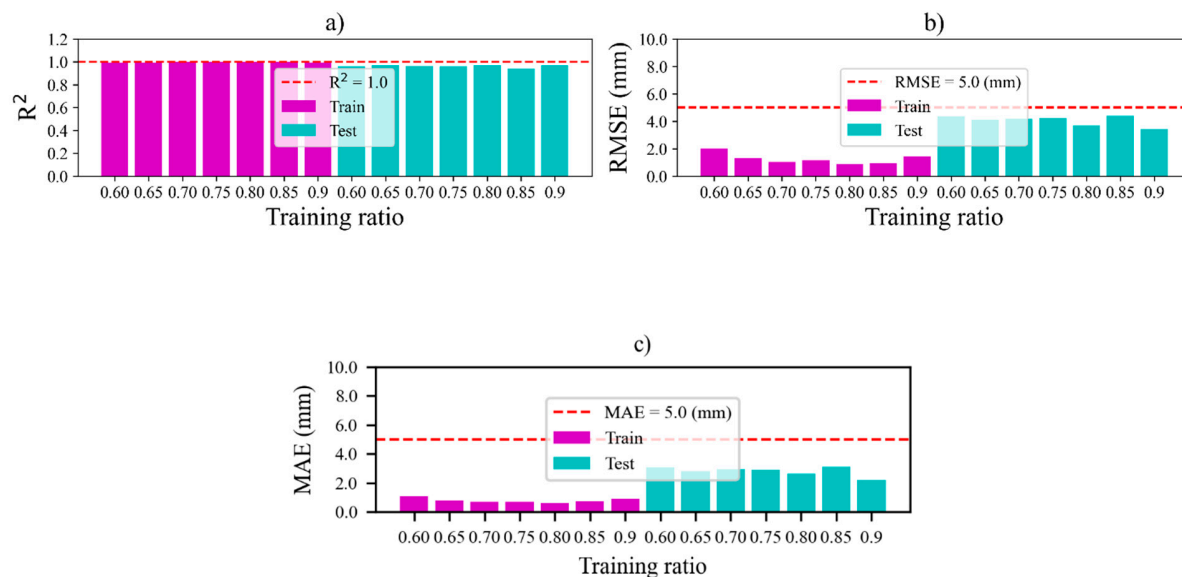

**Fig. S-30.** Effect of training-test ratios on the MVO-XGB model's performance with population size of 250.

**Table S-1** Performance of PSO-XGB models on the test set

| <b>Pop. size</b> | <b>Training ratio</b> | <b>R<sup>2</sup></b> | <b>Score</b> | <b>RMSE</b> | <b>Score</b> | <b>MAE</b> | <b>Score</b> | <b>Total</b> |
|------------------|-----------------------|----------------------|--------------|-------------|--------------|------------|--------------|--------------|
| 50               | 0.60                  | 0.961                | 13           | 4.365       | 8            | 3.143      | 5            | 26           |
|                  | 0.65                  | 0.957                | 7            | 4.846       | 1            | 3.271      | 2            | 10           |
|                  | 0.70                  | 0.965                | 19           | 4.042       | 20           | 2.816      | 18           | 57           |
|                  | 0.75                  | 0.966                | 20           | 3.923       | 25           | 2.778      | 19           | 64           |
|                  | 0.80                  | 0.963                | 16           | 3.983       | 22           | 2.957      | 12           | 50           |
|                  | 0.85                  | 0.941                | 3            | 4.363       | 9            | 3.001      | 11           | 23           |
|                  | 0.90                  | 0.969                | 32           | 3.398       | 32           | 2.134      | 33           | 97           |
| 100              | 0.60                  | 0.962                | 15           | 4.308       | 10           | 3.045      | 9            | 34           |
|                  | 0.65                  | 0.968                | 25           | 4.096       | 16           | 2.624      | 29           | 70           |
|                  | 0.70                  | 0.951                | 6            | 4.739       | 2            | 3.332      | 1            | 9            |
|                  | 0.75                  | 0.968                | 23           | 3.825       | 27           | 2.668      | 26           | 76           |

|     |             |              |           |              |           |              |           |            |
|-----|-------------|--------------|-----------|--------------|-----------|--------------|-----------|------------|
|     | 0.80        | 0.96         | 11        | 4.14         | 12        | 3.07         | 6         | 29         |
|     | 0.85        | 0.938        | 2         | 4.457        | 5         | 3.04         | 10        | 17         |
|     | 0.90        | 0.967        | 22        | 3.534        | 31        | 2.31         | 31        | 84         |
| 150 | 0.60        | 0.968        | 27        | 3.936        | 23        | 2.659        | 27        | 77         |
|     | 0.65        | 0.968        | 26        | 4.129        | 13        | 2.694        | 24        | 63         |
|     | 0.70        | 0.964        | 17        | 4.098        | 15        | 2.831        | 17        | 49         |
|     | 0.75        | 0.969        | 30        | 3.754        | 28        | 2.616        | 30        | 88         |
|     | 0.80        | 0.961        | 14        | 4.089        | 18        | 2.877        | 14        | 46         |
|     | 0.85        | 0.947        | 4         | 4.105        | 14        | 2.721        | 22        | 40         |
|     | <b>0.90</b> | <b>0.975</b> | <b>34</b> | <b>3.097</b> | <b>35</b> | <b>2.019</b> | <b>35</b> | <b>104</b> |
| 200 | 0.60        | 0.96         | 9         | 4.458        | 4         | 3.059        | 7         | 20         |
|     | 0.65        | 0.969        | 29        | 4.082        | 19        | 2.656        | 28        | 76         |
|     | 0.70        | 0.958        | 8         | 4.396        | 7         | 3.048        | 8         | 23         |
|     | 0.75        | 0.969        | 31        | 3.724        | 29        | 2.705        | 23        | 83         |
|     | 0.80        | 0.964        | 18        | 3.931        | 24        | 2.846        | 15        | 57         |
|     | 0.85        | 0.949        | 5         | 4.027        | 21        | 2.841        | 16        | 42         |
|     | 0.90        | 0.975        | 35        | 3.144        | 33        | 2.032        | 34        | 102        |
| 250 | 0.60        | 0.96         | 10        | 4.409        | 6         | 3.152        | 4         | 20         |
|     | 0.65        | 0.968        | 24        | 4.096        | 17        | 2.76         | 21        | 62         |
|     | 0.70        | 0.961        | 12        | 4.277        | 11        | 2.915        | 13        | 36         |
|     | 0.75        | 0.967        | 21        | 3.878        | 26        | 2.763        | 20        | 67         |
|     | 0.80        | 0.968        | 28        | 3.695        | 30        | 2.671        | 25        | 83         |
|     | 0.85        | 0.932        | 1         | 4.66         | 3         | 3.254        | 3         | 7          |
|     | 0.90        | 0.974        | 33        | 3.124        | 34        | 2.222        | 32        | 99         |

**Table S-2** Performance of GWO-XGB models on the test set

| Pop. size | Training ratio | R <sup>2</sup> | Score | RMSE  | Score | MAE   | Score | Total |
|-----------|----------------|----------------|-------|-------|-------|-------|-------|-------|
| 50        | 0.60           | 0.959          | 10    | 4.469 | 5     | 3.087 | 5     | 20    |
|           | 0.65           | 0.965          | 20    | 4.287 | 10    | 2.872 | 12    | 42    |
|           | 0.70           | 0.963          | 18    | 4.131 | 15    | 2.841 | 18    | 51    |
|           | 0.75           | 0.967          | 25    | 3.842 | 28    | 2.768 | 22    | 75    |
|           | 0.80           | 0.963          | 17    | 3.984 | 19    | 2.835 | 19    | 55    |
|           | 0.85           | 0.937          | 1     | 4.483 | 4     | 3.156 | 3     | 8     |
|           | 0.90           | 0.977          | 34    | 2.945 | 34    | 2.064 | 34    | 102   |
| 100       | 0.60           | 0.96           | 12    | 4.435 | 7     | 3.062 | 7     | 26    |
|           | 0.65           | 0.968          | 28    | 4.13  | 16    | 2.939 | 9     | 53    |
|           | 0.70           | 0.956          | 7     | 4.535 | 3     | 3.095 | 4     | 14    |
|           | 0.75           | 0.966          | 22    | 3.926 | 24    | 2.764 | 23    | 69    |

|     |             |              |           |              |           |              |           |            |
|-----|-------------|--------------|-----------|--------------|-----------|--------------|-----------|------------|
|     | 0.80        | 0.968        | 29        | 3.735        | 31        | 2.572        | 30        | 90         |
|     | 0.85        | 0.945        | 4         | 4.209        | 12        | 2.847        | 17        | 33         |
|     | 0.90        | 0.961        | 14        | 3.883        | 26        | 2.383        | 33        | 73         |
| 150 | 0.60        | 0.96         | 11        | 4.447        | 6         | 3.067        | 6         | 23         |
|     | 0.65        | 0.969        | 32        | 4.045        | 18        | 2.859        | 14        | 64         |
|     | 0.70        | 0.961        | 15        | 4.236        | 11        | 2.926        | 10        | 36         |
|     | 0.75        | 0.97         | 33        | 3.678        | 33        | 2.685        | 28        | 94         |
|     | 0.80        | 0.964        | 19        | 3.949        | 21        | 2.732        | 25        | 65         |
|     | 0.85        | 0.953        | 5         | 3.848        | 27        | 2.596        | 29        | 61         |
|     | <b>0.90</b> | <b>0.981</b> | <b>35</b> | <b>2.835</b> | <b>35</b> | <b>1.906</b> | <b>35</b> | <b>105</b> |
| 200 | 0.60        | 0.955        | 6         | 4.657        | 1         | 3.229        | 1         | 8          |
|     | 0.65        | 0.967        | 27        | 4.164        | 13        | 2.854        | 16        | 56         |
|     | 0.70        | 0.967        | 24        | 3.927        | 23        | 2.817        | 21        | 68         |
|     | 0.75        | 0.966        | 23        | 3.902        | 25        | 2.76         | 24        | 72         |
|     | 0.80        | 0.968        | 31        | 3.694        | 32        | 2.696        | 26        | 89         |
|     | 0.85        | 0.942        | 3         | 4.334        | 9         | 2.95         | 8         | 20         |
|     | 0.90        | 0.963        | 16        | 3.789        | 30        | 2.474        | 32        | 78         |
| 250 | 0.60        | 0.957        | 8         | 4.563        | 2         | 3.169        | 2         | 12         |
|     | 0.65        | 0.968        | 30        | 4.139        | 14        | 2.831        | 20        | 64         |
|     | 0.70        | 0.966        | 21        | 3.973        | 20        | 2.857        | 15        | 56         |
|     | 0.75        | 0.967        | 26        | 3.841        | 29        | 2.687        | 27        | 82         |
|     | 0.80        | 0.96         | 13        | 4.129        | 17        | 2.884        | 11        | 41         |
|     | 0.85        | 0.941        | 2         | 4.344        | 8         | 2.868        | 13        | 23         |
|     | 0.90        | 0.959        | 9         | 3.94         | 22        | 2.511        | 31        | 62         |

**Table S-3** Performance of MFO-XGB models on the test set

| Pop. size | Training ratio | R <sup>2</sup> | Score | RMSE  | Score | MAE   | Score | Total |
|-----------|----------------|----------------|-------|-------|-------|-------|-------|-------|
| 50        | 0.60           | 0.957          | 7     | 4.56  | 2     | 3.197 | 1     | 10    |
|           | 0.65           | 0.967          | 21    | 4.169 | 13    | 2.856 | 16    | 50    |
|           | 0.70           | 0.963          | 18    | 4.133 | 15    | 2.905 | 13    | 46    |
|           | 0.75           | 0.961          | 12    | 4.205 | 9     | 2.912 | 12    | 33    |
|           | 0.80           | 0.967          | 24    | 3.761 | 28    | 2.855 | 17    | 69    |
|           | 0.85           | 0.938          | 2     | 4.471 | 4     | 2.926 | 10    | 16    |
|           | 0.90           | 0.969          | 25    | 3.477 | 34    | 2.237 | 35    | 94    |
| 100       | 0.60           | 0.957          | 6     | 4.569 | 1     | 3.135 | 2     | 9     |
|           | 0.65           | 0.972          | 34    | 3.831 | 26    | 2.662 | 26    | 86    |
|           | 0.70           | 0.966          | 20    | 3.977 | 20    | 2.868 | 15    | 55    |
|           | 0.75           | 0.971          | 31    | 3.617 | 31    | 2.609 | 30    | 92    |

|     |             |              |           |              |           |              |           |           |
|-----|-------------|--------------|-----------|--------------|-----------|--------------|-----------|-----------|
|     | 0.80        | 0.96         | 11        | 4.136        | 14        | 2.9          | 14        | 39        |
|     | 0.85        | 0.941        | 3         | 4.362        | 6         | 3.031        | 6         | 15        |
|     | 0.90        | 0.967        | 23        | 3.524        | 33        | 2.339        | 33        | 89        |
| 150 | 0.60        | 0.967        | 22        | 4.002        | 19        | 2.779        | 21        | 62        |
|     | 0.65        | 0.972        | 33        | 3.905        | 25        | 2.718        | 23        | 81        |
|     | 0.70        | 0.958        | 8         | 4.436        | 5         | 3.085        | 4         | 17        |
|     | <b>0.75</b> | <b>0.972</b> | <b>35</b> | <b>3.542</b> | <b>32</b> | <b>2.485</b> | <b>31</b> | <b>98</b> |
|     | 0.80        | 0.964        | 19        | 3.947        | 22        | 2.798        | 19        | 60        |
|     | 0.85        | 0.944        | 4         | 4.224        | 8         | 2.719        | 22        | 34        |
|     | 0.90        | 0.959        | 9         | 3.952        | 21        | 2.628        | 28        | 58        |
| 200 | 0.60        | 0.962        | 17        | 4.287        | 7         | 3.016        | 7         | 31        |
|     | 0.65        | 0.969        | 27        | 4.038        | 18        | 2.852        | 18        | 63        |
|     | 0.70        | 0.962        | 16        | 4.188        | 11        | 2.928        | 9         | 36        |
|     | 0.75        | 0.969        | 28        | 3.719        | 29        | 2.65         | 27        | 84        |
|     | 0.80        | 0.96         | 10        | 4.184        | 12        | 3.078        | 5         | 27        |
|     | 0.85        | 0.936        | 1         | 4.532        | 3         | 3.111        | 3         | 7         |
|     | <b>0.90</b> | <b>0.969</b> | <b>29</b> | <b>3.433</b> | <b>35</b> | <b>2.284</b> | <b>34</b> | <b>98</b> |
| 250 | 0.60        | 0.969        | 26        | 3.912        | 24        | 2.705        | 24        | 74        |
|     | 0.65        | 0.971        | 32        | 3.93         | 23        | 2.702        | 25        | 80        |
|     | 0.70        | 0.962        | 14        | 4.198        | 10        | 2.953        | 8         | 32        |
|     | 0.75        | 0.971        | 30        | 3.651        | 30        | 2.614        | 29        | 89        |
|     | 0.80        | 0.962        | 15        | 4.05         | 17        | 2.917        | 11        | 43        |
|     | 0.85        | 0.948        | 5         | 4.094        | 16        | 2.794        | 20        | 41        |
|     | 0.90        | 0.962        | 13        | 3.815        | 27        | 2.42         | 32        | 72        |

**Table S-4** Performance of JA-XGB models on the test set

| Pop. size | Training ratio | R <sup>2</sup> | Score     | RMSE         | Score     | MAE          | Score     | Total     |
|-----------|----------------|----------------|-----------|--------------|-----------|--------------|-----------|-----------|
| 50        | 0.60           | 0.966          | 31        | 4.061        | 20        | 2.88         | 19        | 70        |
|           | 0.65           | 0.965          | 26        | 4.349        | 9         | 2.912        | 17        | 52        |
|           | 0.70           | 0.965          | 27        | 4.029        | 22        | 3.044        | 8         | 57        |
|           | 0.75           | 0.961          | 18        | 4.169        | 17        | 2.837        | 21        | 56        |
|           | 0.80           | 0.964          | 24        | 3.944        | 27        | 2.761        | 24        | 75        |
|           | 0.85           | 0.94           | 1         | 4.364        | 8         | 3.038        | 9         | 18        |
|           | <b>0.90</b>    | <b>0.966</b>   | <b>29</b> | <b>3.593</b> | <b>34</b> | <b>2.280</b> | <b>35</b> | <b>98</b> |
| 100       | 0.60           | 0.968          | 34        | 3.968        | 24        | 2.782        | 22        | 80        |
|           | 0.65           | 0.963          | 19        | 4.387        | 5         | 3.051        | 7         | 31        |
|           | 0.70           | 0.963          | 20        | 4.124        | 19        | 2.963        | 14        | 53        |
|           | 0.75           | 0.96           | 14        | 4.262        | 13        | 2.886        | 18        | 45        |



|     |      |       |    |       |    |       |    |    |
|-----|------|-------|----|-------|----|-------|----|----|
|     | 0.80 | 0.958 | 6  | 4.395 | 4  | 3.013 | 11 | 21 |
|     | 0.85 | 0.959 | 7  | 3.667 | 31 | 2.545 | 31 | 69 |
|     | 0.90 | 0.959 | 12 | 4     | 23 | 2.678 | 27 | 62 |
| 150 | 0.60 | 0.954 | 5  | 4.737 | 1  | 3.263 | 1  | 7  |
|     | 0.65 | 0.964 | 22 | 4.378 | 6  | 2.95  | 16 | 44 |
|     | 0.70 | 0.959 | 11 | 4.34  | 11 | 2.997 | 12 | 34 |
|     | 0.75 | 0.96  | 16 | 4.23  | 16 | 2.852 | 20 | 52 |
|     | 0.80 | 0.967 | 33 | 3.758 | 30 | 2.561 | 29 | 92 |
|     | 0.85 | 0.952 | 3  | 3.909 | 29 | 2.78  | 23 | 55 |
|     | 0.90 | 0.959 | 9  | 3.962 | 26 | 2.423 | 33 | 68 |
| 200 | 0.60 | 0.959 | 13 | 4.453 | 3  | 3.096 | 4  | 20 |
|     | 0.65 | 0.964 | 21 | 4.365 | 7  | 3.022 | 10 | 38 |
|     | 0.70 | 0.954 | 4  | 4.638 | 2  | 3.172 | 2  | 8  |
|     | 0.75 | 0.96  | 15 | 4.246 | 14 | 3.102 | 3  | 32 |
|     | 0.80 | 0.964 | 23 | 3.965 | 25 | 2.722 | 26 | 74 |
|     | 0.85 | 0.961 | 17 | 3.517 | 35 | 2.547 | 30 | 82 |
|     | 0.90 | 0.966 | 30 | 3.645 | 33 | 2.413 | 34 | 97 |
| 250 | 0.60 | 0.965 | 25 | 4.144 | 18 | 2.955 | 15 | 58 |
|     | 0.65 | 0.969 | 35 | 4.049 | 21 | 2.726 | 25 | 81 |
|     | 0.70 | 0.967 | 32 | 3.924 | 28 | 2.677 | 28 | 88 |
|     | 0.75 | 0.959 | 8  | 4.338 | 12 | 3.066 | 6  | 26 |
|     | 0.80 | 0.959 | 10 | 4.343 | 10 | 3.089 | 5  | 25 |
|     | 0.85 | 0.944 | 2  | 4.232 | 15 | 2.964 | 13 | 30 |
|     | 0.90 | 0.965 | 28 | 3.648 | 32 | 2.514 | 32 | 92 |

**Table S-5** Performance of MVO-XGB models on the test set

| Pop. size | Training ratio | R <sup>2</sup> | Score | RMSE  | Score | MAE   | Score | Total |
|-----------|----------------|----------------|-------|-------|-------|-------|-------|-------|
| 50        | 0.60           | 0.962          | 16    | 4.361 | 8     | 3.112 | 3     | 27    |
|           | 0.65           | 0.973          | 34    | 3.831 | 28    | 2.663 | 27    | 89    |
|           | 0.70           | 0.96           | 11    | 4.296 | 10    | 2.883 | 18    | 39    |
|           | 0.75           | 0.968          | 26    | 3.835 | 27    | 2.773 | 23    | 76    |
|           | 0.80           | 0.964          | 19    | 3.949 | 23    | 2.909 | 16    | 58    |
|           | 0.85           | 0.942          | 2     | 4.327 | 9     | 2.909 | 14    | 25    |
|           | 0.90           | 0.971          | 32    | 3.301 | 34    | 2.206 | 34    | 100   |
| 100       | 0.60           | 0.961          | 13    | 4.363 | 6     | 3.007 | 7     | 26    |
|           | 0.65           | 0.965          | 22    | 4.285 | 11    | 2.867 | 19    | 52    |
|           | 0.70           | 0.959          | 9     | 4.381 | 5     | 3.051 | 5     | 19    |
|           | 0.75           | 0.971          | 31    | 3.617 | 31    | 2.521 | 31    | 93    |

|     |             |              |           |              |           |              |           |            |
|-----|-------------|--------------|-----------|--------------|-----------|--------------|-----------|------------|
|     | 0.80        | 0.966        | 23        | 3.842        | 26        | 2.666        | 26        | 75         |
|     | 0.85        | 0.945        | 5         | 4.208        | 16        | 2.917        | 13        | 34         |
|     | 0.90        | 0.964        | 20        | 3.656        | 30        | 2.481        | 32        | 82         |
| 150 | 0.60        | 0.963        | 18        | 4.264        | 14        | 2.969        | 8         | 40         |
|     | 0.65        | 0.969        | 30        | 4.012        | 22        | 2.841        | 21        | 73         |
|     | 0.70        | 0.958        | 8         | 4.407        | 3         | 2.931        | 11        | 22         |
|     | 0.75        | 0.967        | 25        | 3.891        | 25        | 2.642        | 29        | 79         |
|     | 0.80        | 0.962        | 17        | 4.033        | 21        | 2.856        | 20        | 58         |
|     | 0.85        | 0.943        | 4         | 4.274        | 13        | 2.948        | 10        | 27         |
|     | 0.90        | 0.955        | 6         | 4.099        | 20        | 2.687        | 25        | 51         |
| 200 | 0.60        | 0.96         | 10        | 4.452        | 2         | 3.01         | 6         | 18         |
|     | 0.65        | 0.966        | 24        | 4.202        | 17        | 2.884        | 17        | 58         |
|     | 0.70        | 0.956        | 7         | 4.517        | 1         | 3.148        | 1         | 9          |
|     | 0.75        | 0.971        | 33        | 3.583        | 32        | 2.569        | 30        | 95         |
|     | 0.80        | 0.965        | 21        | 3.922        | 24        | 2.771        | 24        | 69         |
|     | 0.85        | 0.943        | 3         | 4.277        | 12        | 2.954        | 9         | 24         |
|     | <b>0.90</b> | <b>0.975</b> | <b>35</b> | <b>3.041</b> | <b>35</b> | <b>2.152</b> | <b>35</b> | <b>105</b> |
| 250 | 0.60        | 0.961        | 14        | 4.362        | 7         | 3.054        | 4         | 25         |
|     | 0.65        | 0.968        | 27        | 4.121        | 19        | 2.797        | 22        | 68         |
|     | 0.70        | 0.962        | 15        | 4.202        | 18        | 2.923        | 12        | 45         |
|     | 0.75        | 0.961        | 12        | 4.21         | 15        | 2.909        | 15        | 42         |
|     | 0.80        | 0.969        | 28        | 3.694        | 29        | 2.643        | 28        | 85         |
|     | 0.85        | 0.939        | 1         | 4.396        | 4         | 3.114        | 2         | 7          |
|     | 0.90        | 0.969        | 29        | 3.436        | 33        | 2.219        | 33        | 95         |
